# Supplementary material
Source: PubMed Central journal article supplement (PMC4272704)
Supplement: AEM.02906-14_zam999105876so1.pdf [file AEM.02906-14_zam999105876so1.pdf]

## **Supplemental information**

Acquisition of the ability to assimilate mannitol by *Saccharomyces cerevisiae* through dysfunction of the general corepressor Tup1–Cyc8

Moeko Chujo, Shiori Yoshida, Anri Ota, Kousaku Murata, Shigeyuki Kawai

Laboratory of Basic and Applied Molecular Biotechnology, Division of Food and Biological Science, Graduate School of Agriculture, Kyoto University, Uji, Kyoto, Japan.

### **Supplementary Results**

**Supplementary Figures S1 – S6**

**Supplementary Tables S1 – S4**

**Supplementary References**

## Supplementary Results

**Isolation of Mtl<sup>+</sup> strains.** Fresh BY4742 cells (approximately  $5 \times 10^6$  cells; OD<sub>600</sub> of 1.0 corresponds to  $0.7 \times 10^7$  cells/ml) were grown to log phase in liquid YPD medium and spread on SM plates. After 7 days of incubation, several visible colonies appeared on the plates (Fig. 1B). Two colonies were randomly picked and purified twice by streaking on SM plates. The resultant clones were grown in SM liquid medium for 2 days and stored as glycerol stocks (glycerol conc. 17%) at -80°C as MK3619 and MK3683 (Table 1).

BY4742 cells (approximately  $10^7$  cells) were harvested from YPG plates, suspended in sterilized distilled water (SDW), and spread on YPM plates. After 7 days of incubation, approximately 16 large colonies were formed. Eight large colonies were picked and purified as described above. Of those eight colonies, two exhibited no growth in SM liquid media, one colony exhibited the Flo<sup>+</sup> phenotype in both SC and SM liquid media, and four colonies exhibited the Flo<sup>+</sup> phenotype only in SC liquid medium and Flo<sup>-</sup> growth in SM liquid medium. The remaining colony, which exhibited Flo<sup>-</sup> growth in both SC and SM liquid media after 2 days of cultivation, was stored at -80°C as described above as MK4010 (Table 1).

BY4742 cells (approximately  $10^7$  cells) were independently harvested from YPG plates, suspended in SDW, and spread on SM plates. After 7 days of incubation, more than 70 colonies were formed. Approximately 70 colonies were purified on SM plates as described above, and their growth in SM liquid medium after 2 days of cultivation was examined. Thirty-eight colonies exhibited growth in SM liquid medium and were stored at -80°C as described above. Of those 38 colonies, 14 strains (group 1) were Flo<sup>+</sup>

in both SC and SM liquid media, 8 (group 2) were Flo+ in SC but exhibited Flo- growth in SM medium, and 16 (group 3) exhibited Flo- growth in both SC and SM media. Five strains from group 1 (MK4421, MK4443, MK4446, MK4447, and MK4449; Table 1) and four strains from group 2 (MK4410, MK4412, MK4437, and MK4450; Table 1) were selected and further analyzed. The ability of the strains in group 3 to produce ethanol was examined as described in MATERIALS AND METHODS. Briefly, the strains were grown on YPM plates for 3 days, inoculated to OD<sub>600</sub> of 0.1 in 50 ml YPM liquid medium in a 100 ml Erlenmeyer flask, and then grown at 30°C at 95 rpm, collected, and suspended in SDW. The cells in the suspension were again inoculated to OD<sub>600</sub> of 0.1 in 50 ml YPM liquid medium in a 100 ml Erlenmeyer flask, and then grown at 30°C at 95 rpm for 3 days. Unexpectedly, only MK4416 and MK4456 produced significant amounts of ethanol (at 5,281 and 3,924 mg/l, respectively), whereas MK4424 and MK4461 produced only 179 and 180 mg/l ethanol, respectively; the other strains produced less than 10 mg/l ethanol. MK4416 and MK4456 (Table 1) were selected and further analyzed.

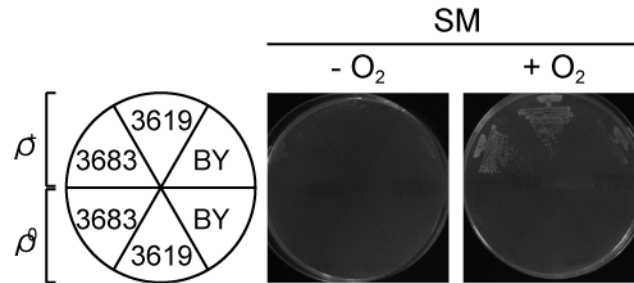

**Fig. S1.** BY4742, MK3619, and MK3683 were cultured on SM plates for 4 days in the absence (-O<sub>2</sub>) or presence (+O<sub>2</sub>) of oxygen. ρ<sup>0</sup> yeast strains, which are devoid of mitochondrial DNA, were created by growing cells in the presence of 25 μg/ml ethidium bromide (1). Anaerobic cultivation was performed using an AnaeroPack-Anaero (Mitsubishi Gas Chemical, Tokyo, Japan).

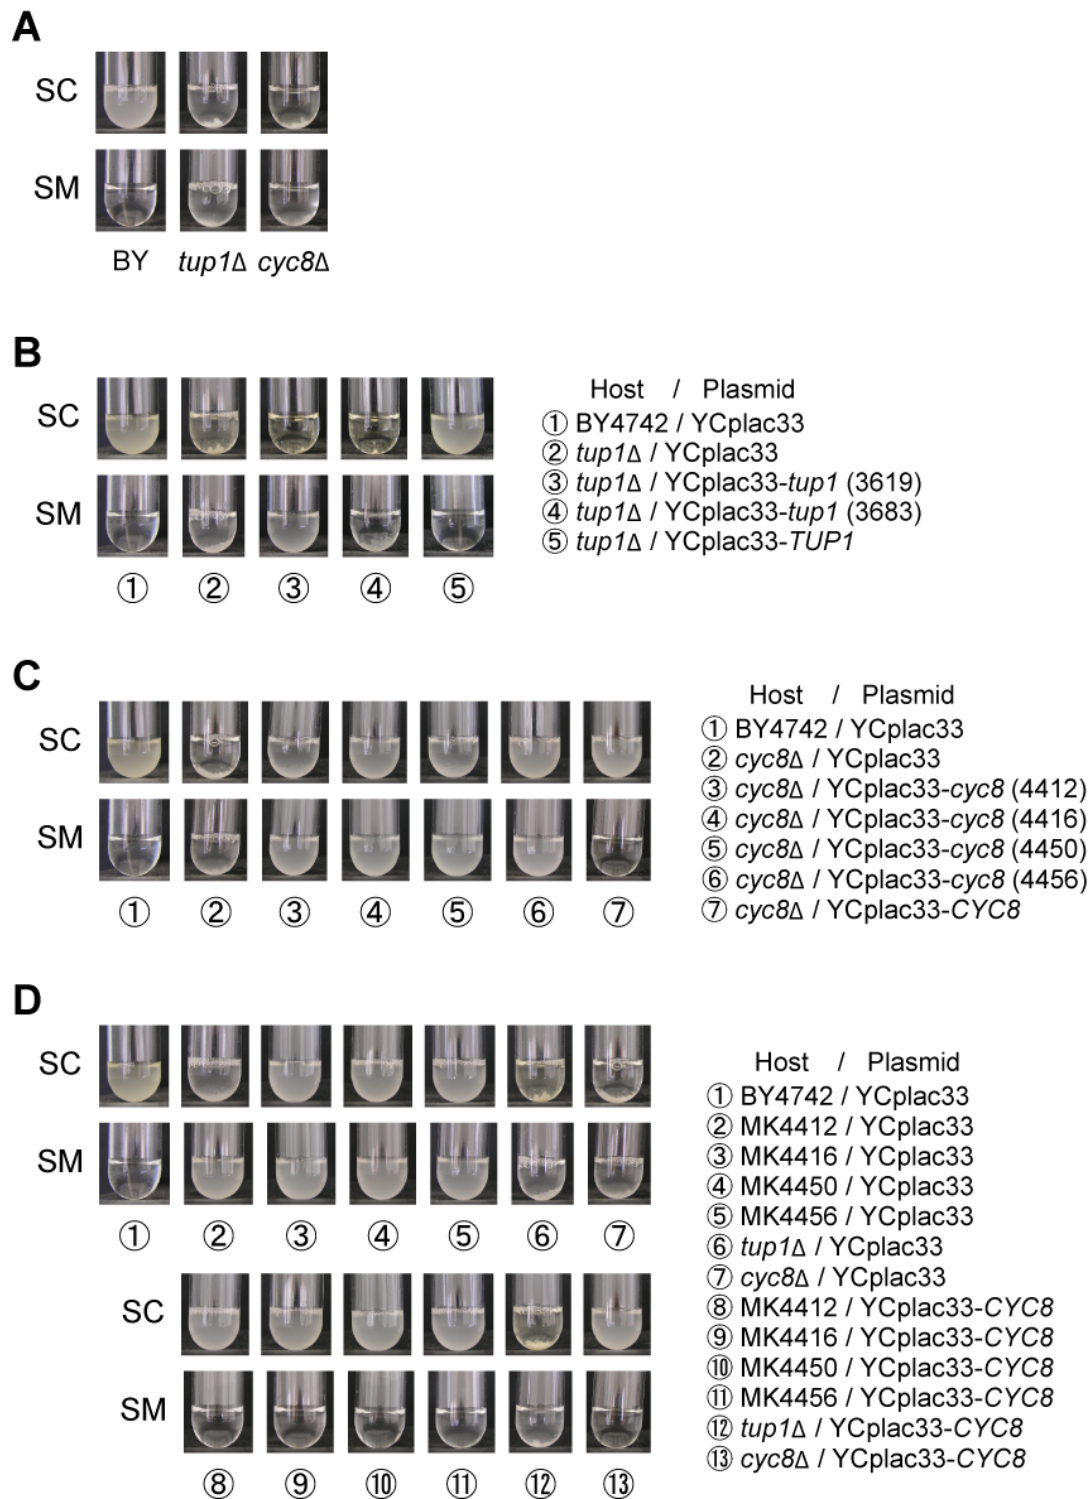

**Fig. S2.** Mutations in *TUP1* or *CYC8* are responsible for acquisition of mannitol assimilation and flocculation phenotypes. Representative images of the indicated strains cultured in SC or SM media, taken on day 3, are shown. (A) Culture images corresponding to Fig. 2A. (B) Culture images corresponding to Fig. 2C. (C) Culture images corresponding to Fig. 2D. (D) Culture images corresponding to Fig. 2E.

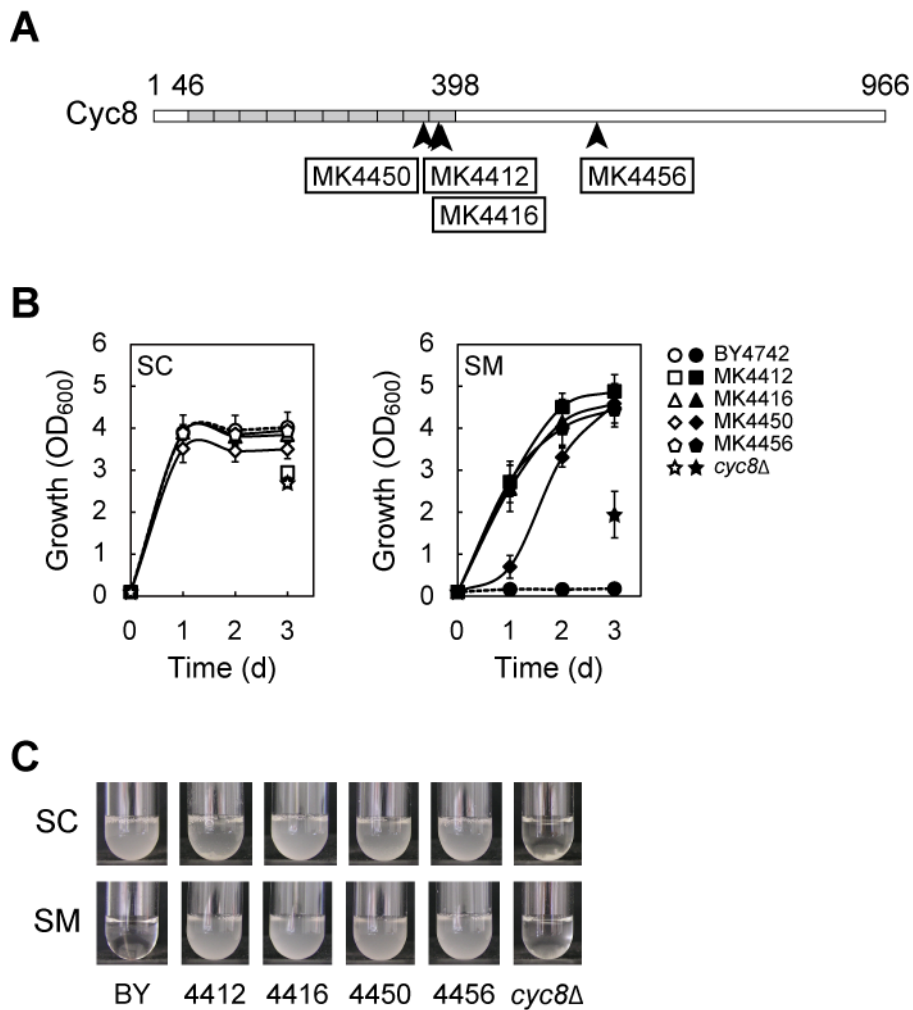

**Fig. S3.** Mutation in *CYC8* is responsible for acquisition of the ability to assimilate mannitol. (A) Schematic structure of Cyc8 (966 amino-acid residues). The TPR motifs are shaded (2). The mutated sites in MK4412, MK4416, MK4450, and MK4456 are indicated by arrowheads. (B) Growth of the indicated strains cultured in SC (open symbols) or SM (closed symbols) media. In the case of flocculated cells, growth was measured only on the third day. Results are the means of at least three independent experiments, and error bars represent SDs. (C) Representative images of the indicated strains cultured in SC or SM media, taken on day 3. Culture images correspond to Fig. S3B.

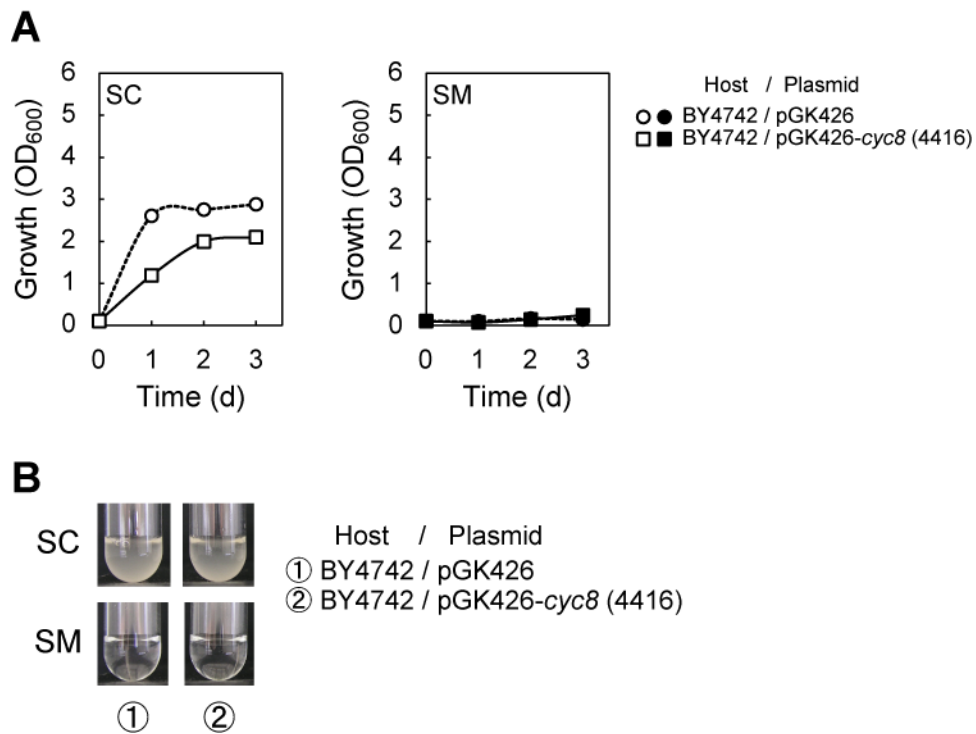

**Fig. S4.** Overexpression of the *CYC8* allele from MK4416 did not confer the ability to assimilate mannitol on wild-type *S. cerevisiae*. (A) Growth of the indicated strains cultured in SC (open symbols) or SM (closed symbols) media. Results are the means of three independent experiments, and error bars represent SDs. The *CYC8* allele from MK4416 cells was cloned into the high-copy plasmid pGK426 (3). The resultant plasmid was introduced into BY4742, and the *CYC8* allele was expressed under the control of the *PGK1* promoter. BY4742 carrying empty pGK426 was used as a control. (B) Representative images of the indicated strains cultured in SC or SM media, taken on day 3. Culture images correspond to Fig. S4A.

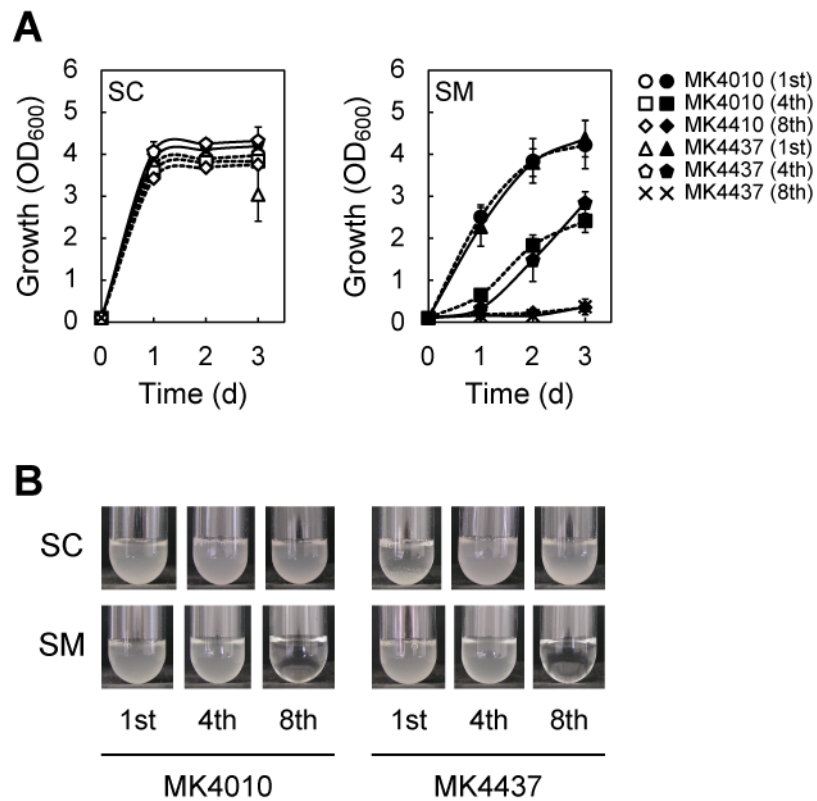

**Fig. S5.** MK4010 and MK4437 cells gradually lost the ability to assimilate mannitol during serial passage. (A) Growth of the indicated strains cultured in SC (open symbols) or SM (closed symbols) media. In the case of flocculated cells, growth was measured only on the third day. Results are the means of at least three independent experiments, and error bars represent SDs. Ordinal number in parentheses represents passage on YPG (for MK4010) and YPD (for MK 4437) plates. (B) Representative images of the indicated strains cultured in SC or SM media, taken on day 3. Culture images correspond to Fig. S5A.



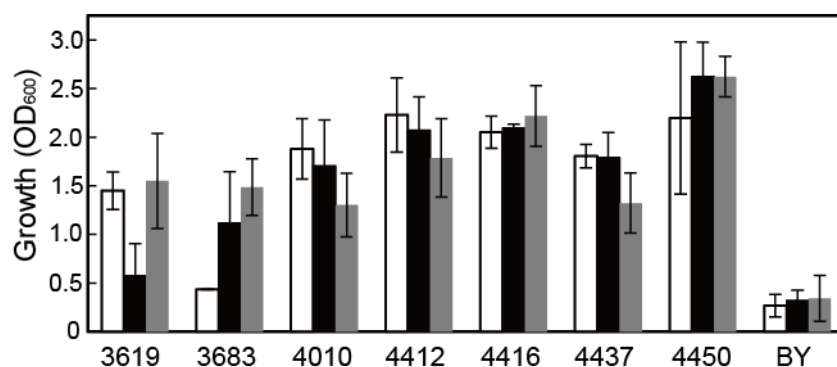

**Fig. S6.** Effects of pre-cultivation of Mtl+ strains in SC liquid medium on their growth in SM liquid medium. The indicated Mtl+ cells and BY742 (BY), which were maintained on YPD plates (only MK4437) or YPG plates (the others), were inoculated to OD<sub>600</sub> of 0.1 in 1.0 ml SM and SC liquid media in test tubes and grown at 30°C at 145 rpm for 24 h. Then OD<sub>600</sub> of the culture in SM medium was measured after addition of 0.1 ml 500 mM EDTA followed with vortexing, and is indicated by a white bar (pre-cultivation in SC medium, none). Cells in the SC medium were collected, washed three times with SDW, again inoculated to OD<sub>600</sub> of roughly 0.1 in 1.0 ml SM and SC liquid media in test tubes, and grown as described above. Again, OD<sub>600</sub> of the culture in SM medium was measured as above and is indicated by a black bar (pre-cultivation in SC medium, only once). Cells in SC medium were collected, washed, inoculated, and grown as described above. OD<sub>600</sub> of the culture in SM medium was measured as described above and is indicated by a gray bar (pre-cultivation in SC medium, twice). Results are the means of three independent experiments, and error bars represent SDs.

Table S1. *S. cerevisiae* strains used in this study

| Strain  | Description                                                                                                                                                                                                        | Source                           |
|---------|--------------------------------------------------------------------------------------------------------------------------------------------------------------------------------------------------------------------|----------------------------------|
| AH109   | <i>MATa trp1-901 leu2-3,112 ura3-52 his3-200 gal4Δ gal80Δ LYS2::GAL1<sub>UAS</sub>-GAL1<sub>TATA</sub>-HIS3 GAL2<sub>UAS</sub>-GAL2<sub>TATA</sub>-ADE2 URA3::MEL1<sub>UAS</sub>-MEL1<sub>TATA</sub>-lacZ MEL1</i> | Clontech                         |
| BY4741  | <i>MATa his3Δ1 leu2Δ0 met15Δ0 ura3Δ0</i>                                                                                                                                                                           | EUROSCARF                        |
| BY4742  | <i>MATα his3Δ1 leu2Δ0 lys2Δ0 ura3Δ0</i>                                                                                                                                                                            | EUROSCARF                        |
| DBY877  | <i>MATα his4-619</i>                                                                                                                                                                                               | Dr. Peter Novick                 |
| EBY100  | <i>MATa leu2Δ1 ura3-52 his3Δ200 trp1 pep4::HIS2 prb1Δ1.6R can1 GAL GAL1-AGA1::URA3</i>                                                                                                                             | Invitrogen                       |
| SEY6210 | <i>MATα leu2-3,112 ura3-52 his3-Δ200 trp1-Δ901 lys2-801suc2-Δ9</i>                                                                                                                                                 | Dr. Gabriele Fischer von Mollard |
| T8-1D   | <i>MATα SUP11 ade2-1 mod5-1 ura3-1 lys2-1 leu2-3,112 his4-519</i>                                                                                                                                                  | Dr. Teresa Zoladek               |
| YPH500  | <i>MATα ura3-52 his3-Δ200 leu2-Δ1 lys2-801 trp1-Δ63 ade2-101</i>                                                                                                                                                   | Dr. Teresa Zoladek               |
| MK3619  | Derived from BY4742                                                                                                                                                                                                | This study                       |
| MK3683  | Derived from BY4742                                                                                                                                                                                                | This study                       |
| MK4010  | Derived from BY4742                                                                                                                                                                                                | This study                       |
| MK4035  | <i>MATα his3Δ1 leu2Δ0 lys2Δ0 ura3Δ0 tup1Δ::kanMX4</i>                                                                                                                                                              | EUROSCARF                        |
| MK4410  | Derived from BY4742                                                                                                                                                                                                | This study                       |
| MK4412  | Derived from BY4742                                                                                                                                                                                                | This study                       |
| MK4416  | Derived from BY4742                                                                                                                                                                                                | This study                       |
| MK4421  | Derived from BY4742                                                                                                                                                                                                | This study                       |
| MK4437  | Derived from BY4742                                                                                                                                                                                                | This study                       |
| MK4443  | Derived from BY4742                                                                                                                                                                                                | This study                       |
| MK4446  | Derived from BY4742                                                                                                                                                                                                | This study                       |
| MK4447  | Derived from BY4742                                                                                                                                                                                                | This study                       |
| MK4449  | Derived from BY4742                                                                                                                                                                                                | This study                       |
| MK4450  | Derived from BY4742                                                                                                                                                                                                | This study                       |
| MK4456  | Derived from BY4742                                                                                                                                                                                                | This study                       |
| MK4965  | <i>MATα his3Δ1 leu2Δ0 lys2Δ0 ura3Δ0 cyc8Δ::kanMX4</i>                                                                                                                                                              | EUROSCARF                        |

Table S2. Genes that were upregulated by more than 4-fold in three conditions relative to the control (BY4742 cells grown in SC)

| Systematic Name  | Gene product                                                               | Fold change |           |           |
|------------------|----------------------------------------------------------------------------|-------------|-----------|-----------|
|                  |                                                                            | 3619 (SM)   | 3683 (SM) | 3683 (SC) |
| <i>YBR040W</i>   | Fig1, integral membrane protein required for efficient mating              | 17.14       | 4.14      | 5.65      |
| <i>YFL011W</i>   | Hxt10, putative hexose transporter                                         | 16.64       | 21.95     | 5.86      |
| <i>YEL070W*</i>  | Dsf1, putative mannitol dehydrogenase                                      | 14.20       | 16.39     | 8.63      |
| <i>YJR150C</i>   | Dan1, anaerobic cell wall mannoprotein                                     | 12.74       | 35.42     | 44.41     |
| <i>YER011W</i>   | Tir1, anaerobic cell wall mannoprotein                                     | 12.45       | 26.19     | 18.06     |
| <i>YML058W-A</i> | Hug1, protein involved in the Mec1p-mediated checkpoint pathway            | 11.42       | 23.15     | 19.39     |
| <i>YOR348C</i>   | Put4, proline permease                                                     | 11.30       | 7.62      | 4.82      |
| <i>YNL145W</i>   | Mfa2, mating pheromone a-factor                                            | 10.54       | 7.84      | 12.15     |
| <i>YOR028C</i>   | Cin5, Basic leucine zipper (bZIP) transcription factor of the yAP-1 family | 9.59        | 8.70      | 4.46      |
| <i>YGR287C</i>   | Ima1, major isomaltase (alpha-1,6-glucosidase/alpha-methylglucosidase)     | 9.49        | 15.89     | 14.16     |
| <i>YOL157C</i>   | Ima2, isomaltase (alpha-1,6-glucosidase/alpha-methylglucosidase)           | 9.35        | 18.33     | 12.07     |
| <i>YIL172C</i>   | Ima3, alpha-glucosidase                                                    | 8.46        | 17.02     | 11.62     |
| <i>YIL160C</i>   | Pot1, 3-ketoacyl-CoA thiolase with broad chain length specificity          | 8.21        | 6.23      | 4.90      |
| <i>YHR214C-E</i> | Putative protein of unknown function                                       | 8.10        | 6.56      | 4.03      |
| <i>YDL244W</i>   | Thi13, protein involved in synthesis of the thiamine precursor HMP         | 7.47        | 8.36      | 5.27      |
| <i>YBR299W</i>   | Mal32, maltase (alpha-D-glucosidase)                                       | 6.64        | 7.91      | 6.59      |
| <i>YJR156C</i>   | Thi11, protein involved in synthesis of the thiamine precursor HMP         | 6.51        | 6.86      | 4.64      |
| <i>YIL015W</i>   | Bar1, aspartyl protease; helps cells find mating partners                  | 6.46        | 5.58      | 9.18      |
| <i>YDL246C</i>   | Sor2, putative sorbitol dehydrogenase                                      | 6.45        | 10.42     | 5.12      |
| <i>YNL332W</i>   | Thi12, protein involved in synthesis of the thiamine precursor HMP         | 6.40        | 6.63      | 4.13      |

|                |                                                                              |      |      |      |
|----------------|------------------------------------------------------------------------------|------|------|------|
| <i>YGL089C</i> | Mf(alpha)2, mating pheromone alpha-factor                                    | 6.27 | 5.97 | 4.52 |
| <i>YLR413W</i> | Ina1, putative protein of unknown function                                   | 6.16 | 8.99 | 6.99 |
| <i>YFL058W</i> | Thi5, protein involved in synthesis of the thiamine precursor HMP            | 5.96 | 6.19 | 4.07 |
| <i>YER096W</i> | Shc1, sporulation-specific activator of Chs3p (chitin synthase III)          | 5.51 | 6.39 | 4.99 |
| <i>YDR461W</i> | Mfa1, mating pheromone a-factor                                              | 4.24 | 4.21 | 6.22 |
| <i>YKR034W</i> | Dal80, negative regulator of genes in multiple nitrogen degradation pathways | 4.07 | 4.38 | 4.67 |

\**S. cerevisiae* has two putative homologs of mannitol dehydrogenase (*YEL070W* and *YNR073C*). *YEL070W* cannot be distinguished from *YNR073C* in microarray analysis because their nucleotide sequences are 98.9% identical.

Table S3. Putative hexose transporter genes\* and their fold change in expression level relative to that of BY4742 cells in SC

| Systematic Name            | Gene product                                                                                               | Fold change |           |           |
|----------------------------|------------------------------------------------------------------------------------------------------------|-------------|-----------|-----------|
|                            |                                                                                                            | 3619 (SM)   | 3683 (SM) | 3683 (SC) |
| <i>YHR094C</i>             | Hxt1, low-affinity glucose transporter of the major facilitator superfamily                                | 0.11        | 0.29      | 0.87      |
| <i>YMR011W</i>             | Hxt2, high-affinity glucose transporter of the major facilitator superfamily                               | 1.84        | 3.47      | 4.03      |
| <i>YDR345C</i>             | Hxt3, low affinity glucose transporter of the major facilitator superfamily                                | 0.12        | 0.50      | 1.03      |
| <i>YHR092C</i>             | Hxt4, high-affinity glucose transporter; member of the major facilitator superfamily                       | 0.11        | 0.38      | 1.33      |
| <i>YHR096C</i>             | Hxt5, hexose transporter with moderate affinity for glucose                                                | 2.03        | 1.66      | 0.76      |
| <i>YDR342C<sup>†</sup></i> | Hxt7, high-affinity glucose transporter; member of the major facilitator superfamily                       | 0.92        | 0.87      | 1.25      |
| <i>YJL214W</i>             | Hxt8, protein of unknown function with similarity to hexose transporters                                   | 2.09        | 6.48      | 11.81     |
| <i>YJL219W</i>             | Hxt9, putative hexose transporter that has similarity to major facilitator superfamily (MFS) transporters  | 1.78        | 1.33      | 1.59      |
| <i>YFL011W</i>             | Hxt10, putative hexose transporter                                                                         | 16.64       | 21.95     | 5.86      |
| <i>YOL156W</i>             | Hxt11, putative hexose transporter that has similarity to major facilitator superfamily (MFS) transporters | 1.58        | 1.52      | 1.54      |
| <i>YEL069C</i>             | Hxt13, hexose transporter                                                                                  | 4.50        | 5.23      | 1.99      |
| <i>YNL318C</i>             | Hxt14, protein with similarity to hexose transporter family members                                        | 1.35        | 1.33      | 1.16      |
| <i>YDL245C<sup>†</sup></i> | Hxt15, protein of unknown function with similarity to hexose transporters                                  | 2.16        | 2.57      | 1.48      |
| <i>YNR072W</i>             | Hxt17, hexose transporter                                                                                  | 3.37        | 3.87      | 1.63      |
| <i>YLR081W</i>             | Gal2, galactose permease                                                                                   | 2.26        | 1.45      | 1.55      |
| <i>YDL194W</i>             | Snf3, plasma membrane low glucose sensor that regulates glucose transport                                  | 1.46        | 1.20      | 0.96      |
| <i>YDL138W</i>             | Rgt2, plasma membrane high glucose sensor that                                                             | 1.15        | 1.42      | 1.25      |

---

regulates glucose transport

---

\*Because *YIL170W+YIL171W* (Hxt12) is a possible pseudogene, it was not detected in microarray analysis.

†*YDR342C* (Hxt7) cannot be distinguished from *YDR343C* (Hxt6) in microarray analysis because their nucleotide sequences are 99.8% identical.

‡*YDL245C* (Hxt15) cannot be distinguished from *YJR158W* (Hxt16) in microarray analysis because their nucleotide sequences are 99.9% identical.

Table S4. 97 strains from the EUROSCARF haploid deletion sets\* whose growth was examined in SM medium

---

*adr1, aft1, arl3, aro3, ash1, azf1, bas1, bem1, bio3, cin5, cup9, dan4, dot1, dot6, ecm22, eds1, fkh1, fkh2, flo1, flo8, flo10, gcn4, gcn5, gcr1, gis1, gts1, hap2, hap3, hap4, hap5, hda1, hda2, hek2, hhf1, hht1, hir1, hos2, hos3, ime2, isw2, med2, mga1, mig1, mig2, mot3, msn2, msn4, mss11, mtm1, muc1, nrg1, opi1, pgd1, phd1, pho4, put3, rco1, rfm1, rfx1, rgt1, rim101, rlm1, rox1, rpd3, rph1, rpn4, rtg1, rtg3, sap30, sdc1, set2, set3, shg1, sif2, sis2, skn7, sko1, sod1, sok2, srb5, ssn3, ssn8, stb5, sut1, swd1, swi4, swi5, teal, tec1, tod6, ume1, upc2, whi2, xbp1, yap6, yer130c, zap1*

---

\*Each gene was disrupted by the *kanMX4* marker. The genetic background of all strains was as follows: *MAT $\alpha$  his3 $\Delta$ 1 leu2 $\Delta$ 0 lys2 $\Delta$ 0 ura3 $\Delta$ 0*.

## Supplemental References

1. **Fox TD, Folley LS, Mulero JJ, McMullin TW, Thorsness PE, Hedin LO, Costanzo MC.** 1991. Analysis and manipulation of yeast mitochondrial genes. *Methods Enzymol.* **194**:149-165.
2. **Sikorski RS, Boguski MS, Goebel M, Hieter P.** 1990. A repeating amino acid motif in CDC23 defines a family of proteins and a new relationship among genes required for mitosis and RNA synthesis. *Cell* **60**:307-317.
3. **Ishii J, Izawa K, Matsumura S, Wakamura K, Tanino T, Tanaka T, Ogino C, Fukuda H, Kondo A.** 2009. A simple and immediate method for simultaneously evaluating expression level and plasmid maintenance in yeast. *J. Biochem.* **145**:701-708.
